# Supplementary material
Source: Springer Nature journal article supplement (https://www.springermedizin.de/resource/supplementary/12885_2008_1096_MOESM2_ESM.pdf/9471106)

**A.**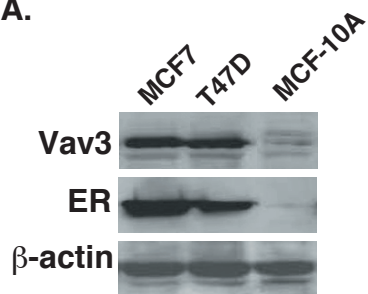**B.**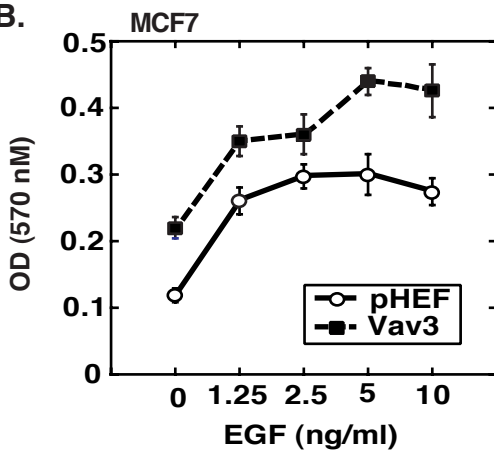**C.**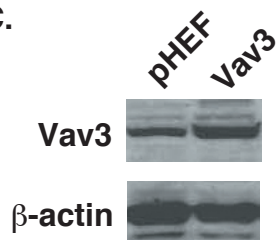**D.**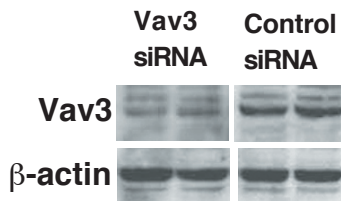**E.**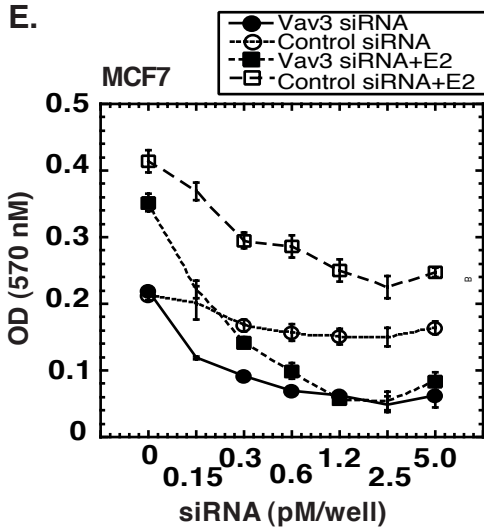**F.**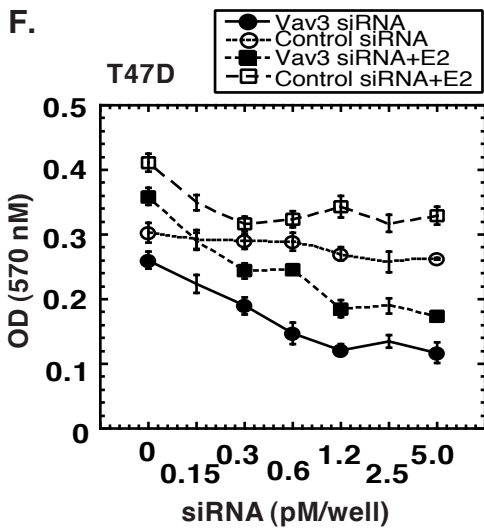

Supplement: MOESM2 [file 9471106]
